# Supplementary material for: AM404, paracetamol metabolite, prevents prostaglandin synthesis in activated microglia by inhibiting COX activity
Source: Springer Nature journal article supplement (doi:10.1186/s12974-017-1014-3), 2017-12-01

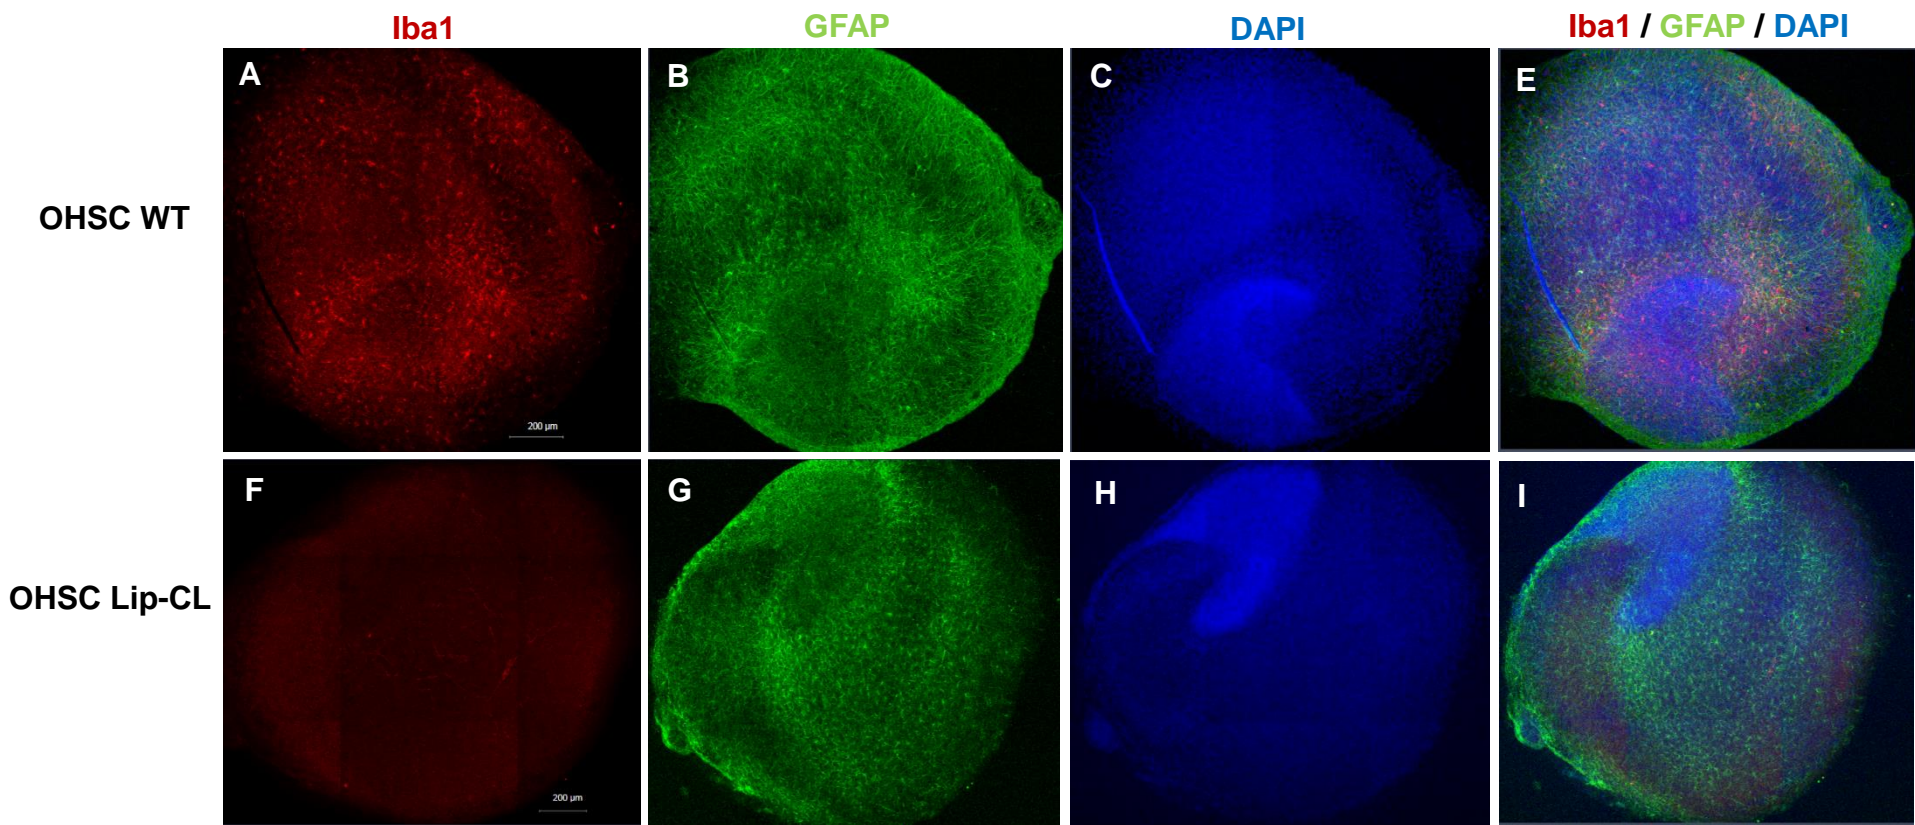

Supplement: MOESM1 [file 15304974]
